# Supplementary material for: Targeting the innate immunoreceptor RIG-I overcomes melanoma-intrinsic resistance to T cell immunotherapy
Source: JCI journal article supplement (doi:10.1172/jci131572), 2020-05-19
Supplement: sd1 [file 1]

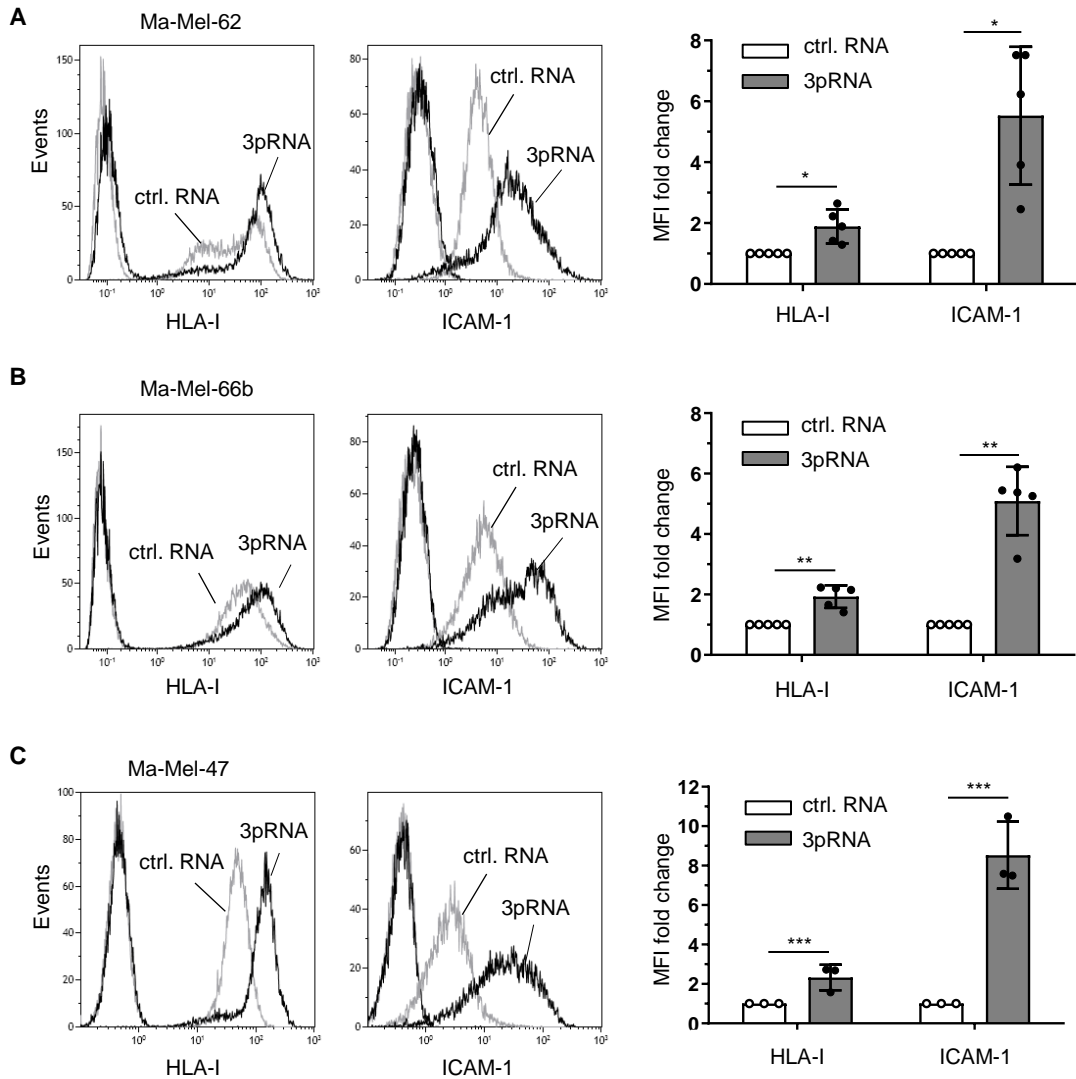

**Supplemental Figure 1. RIG-I activation upregulates HLA-I expression in different melanoma patient models.** (A-C) Melanoma cell lines established from metastases of patients Ma-Mel-62 (A), Ma-Mel-66b (B) and Ma-Mel-47 (C) were transfected with 3pRNA or control (ctrl.) RNA. Following an incubation of 20-24 h, cells were analyzed for HLA-I and ICAM-1 surface expression by flow cytometry. Left, representative histograms; right, relative MFI given as mean (+ SEM) of  $n \geq 3$  independent experiments. Significantly different experimental groups: \* $p < 0.05$ , \*\* $p < 0.01$ , \*\*\* $p < 0.001$ , 2-tailed paired t-test.

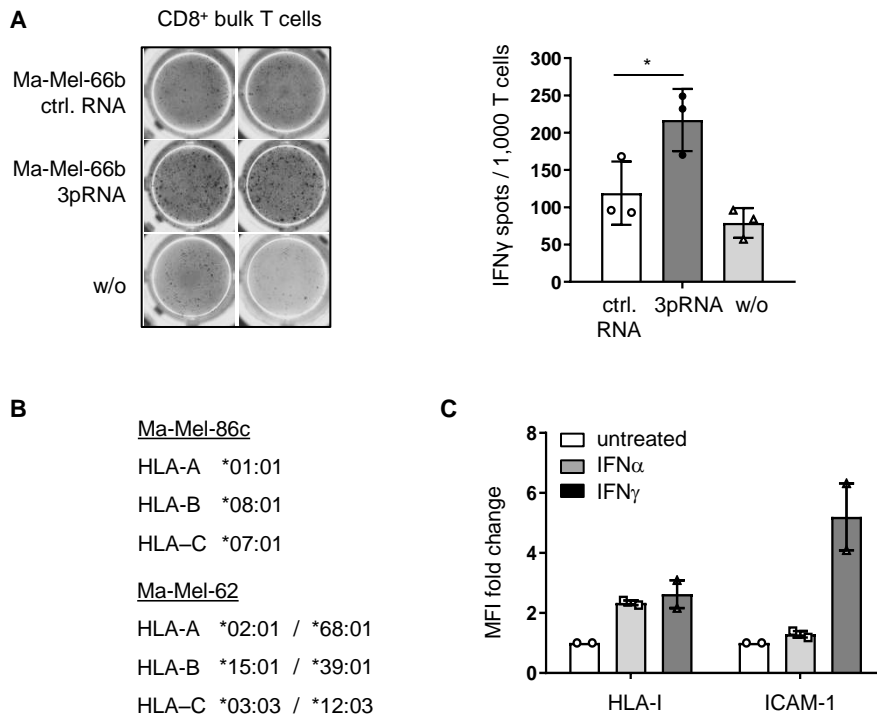

**Supplemental Figure 2. RIG-I activation in melanoma cells enhances recognition by autologous CD8<sup>+</sup> T cells.** (A) Melanoma cells Ma-Mel-66b were transfected with 3pRNA or control (ctrl.) RNA following an incubation of 20-24 h. Activation of bulk CD8<sup>+</sup> T cells by autologous melanoma cells was determined by IFN $\gamma$  ELISpot assay. w/o, incubation of T cells without tumor cells. Left, representative IFN $\gamma$  ELISpot result; right, mean IFN $\gamma$  spots (+ SEM) of n = 3 independent experiments. Significantly different experimental groups: \*p<0.05, 2-tailed paired t-test. (B) HLA-I genotypes of indicated cell lines. (C) Ma-Mel-86c cells were treated with IFN $\alpha$  or IFN $\gamma$  for 20-24 h. Controls were left untreated. HLA-I and ICAM-1 surface expression was measured by flow cytometry. Relative MFI given as mean (+ SEM) of n = 2 independent experiments.

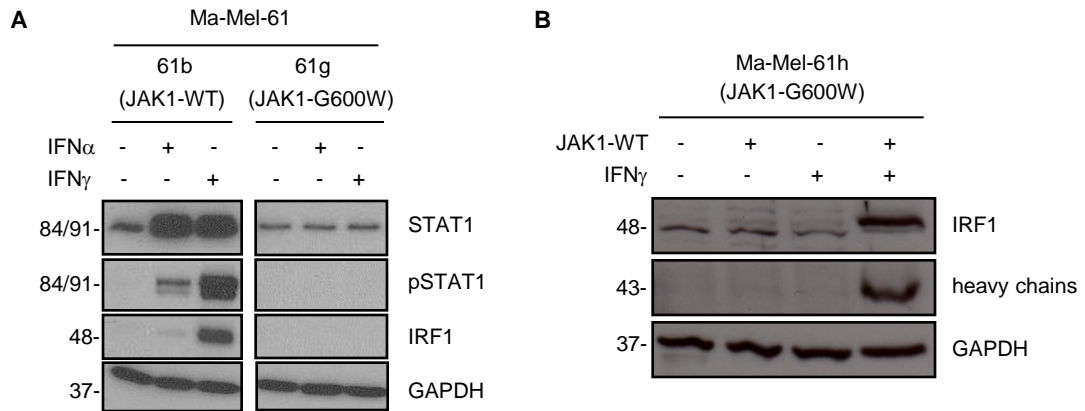

**Supplemental Figure 3. Mutant JAK1-G600W abrogates IFN signaling in Ma-Mel-61g and Ma-Mel-61h melanoma cells.** (A) Ma-Mel-61b and Ma-Mel-61g cells, treated with IFN $\alpha$ -2b or IFN $\gamma$  for 48 h, were analyzed for (p)STAT1 and IRF1 expression by immunoblot; GAPDH, loading control. Representative data of n = 3 independent experiments. (B) Mutant JAK1-G600W Ma-Mel-61h cells, transfected with an expression plasmid encoding wild-type JAK1 followed by treatment with IFN $\gamma$  for 48 h, were analyzed for expression of the indicated proteins. Representative data from n = 3 independent experiments.

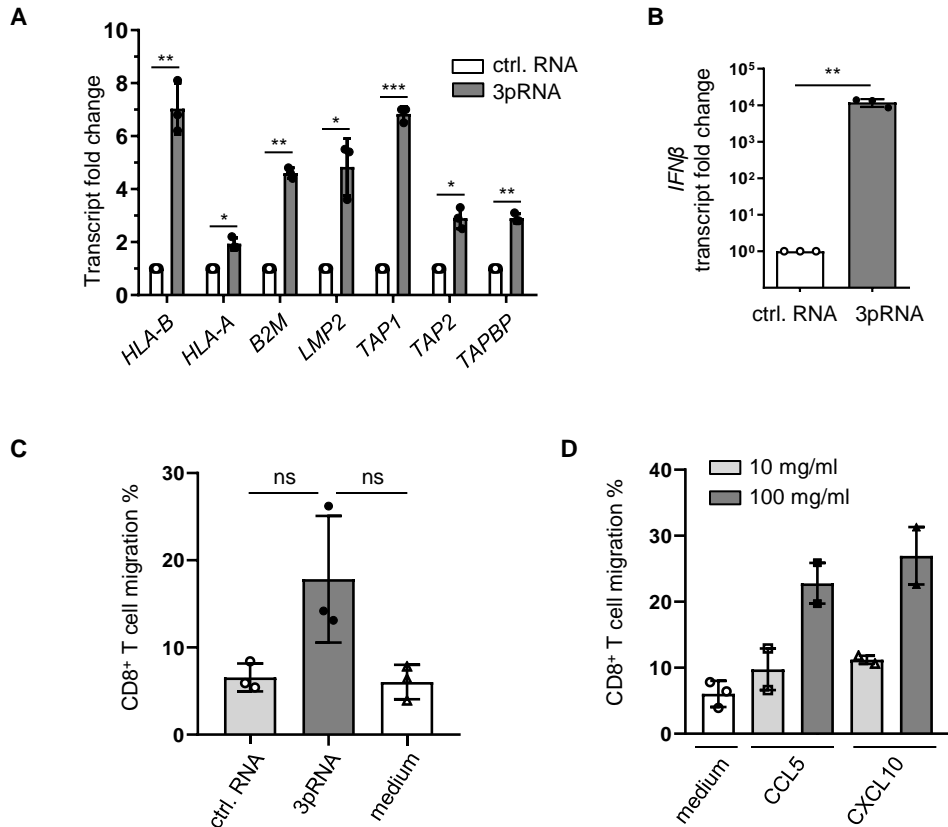

**Supplemental Figure 4. RIG-I activation enhances HLA-I antigen presentation in IFN-resistant Ma-Mel-61g melanoma cells.** (A-C) Ma-Mel-61g cells were transfected with 3pRNA or control (ctrl.) RNA and subjected to further analyses following an incubation of 20-24 h. (A and B) HLA-I APM (A) and *IFNβ* (B) mRNA expression analyzed by qPCR. Relative expression given as mean (+ SEM) of  $n = 3$  independent experiments. Significantly different experimental groups: \* $p < 0.05$ , \*\* $p < 0.01$ , \*\*\* $p < 0.001$ , 2-tailed paired t-test. (C) Migration of CD8<sup>+</sup> T cells towards conditioned medium from 3pRNA- or ctrl. RNA-transfected Ma-Mel-61g cells measured in transwell-assays after an incubation of 4 h. Representative results of  $n = 3$  independent experiments. ns, not significant; 2-tailed paired t-test. (D) Chemokine-induced CD8<sup>+</sup> T cell migration. Migration of CD8<sup>+</sup> T cells towards medium supplemented with recombinant CCL5 or CXCL10 was determined in transwell-assays after 4 h of incubation. Representative results of  $n = 2$  independent experiments.

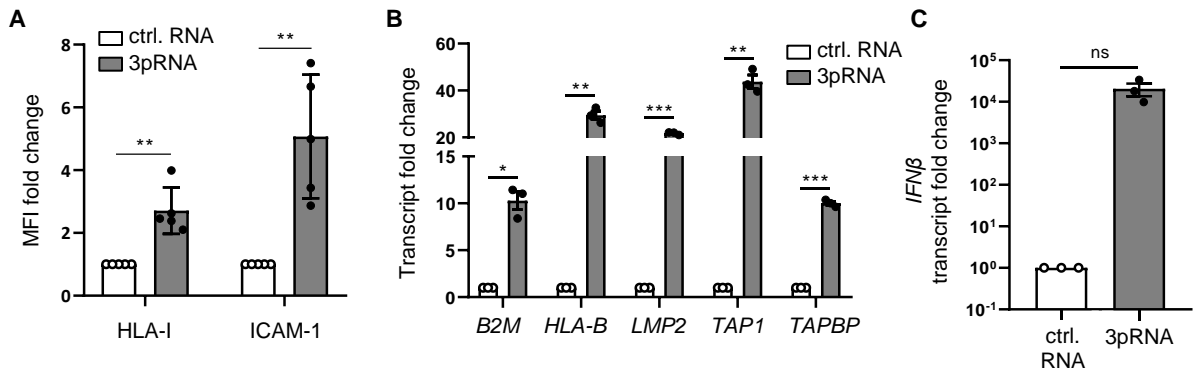

**Supplemental Figure 5. RIG-I activation enhances HLA-I antigen presentation in 3pRNA-treated UKE-Mel-154c cells.** (A-C) UKE-Mel-154c cells were transfected with 3pRNA or control (ctrl.) RNA and subjected to further analyses following an incubation of 20-24 h. (A) HLA-I and ICAM-1 surface expression measured by flow cytometry. Relative MFI given as mean (+ SEM) of  $n \geq 3$  independent experiments. (B and C) HLA-I APM component (B) and *IFNβ* (C) mRNA expression was quantified by qPCR. Relative expression given as mean (+ SEM) of  $n = 3$  independent experiments. Significantly different experimental groups: \* $p < 0.05$ , \*\* $p < 0.01$ , \*\*\* $p < 0.001$ ; ns, not significant; 2-tailed paired t-test.

**Supplemental Table 1:** Differential expression analysis results for HLA-I APM genes in the anti-CTLA-4-treated cohort. Mann-Whitney U test p-values and FDR-corrected q-values are shown for the comparison of individual HLA-I APM gene expression in clinical responders vs. non-responders.

| Gene         | P-value      | Q-value |
|--------------|--------------|---------|
| <i>HLA-A</i> | 0.284        | 0.365   |
| <i>HLA-B</i> | 0.231        | 0.347   |
| <i>HLA-C</i> | 0.344        | 0.387   |
| <i>TAP1</i>  | <b>0.036</b> | 0.148   |
| <i>TAP2</i>  | 0.231        | 0.347   |
| <i>TAPBP</i> | 0.486        | 0.486   |
| <i>B2M</i>   | <b>0.020</b> | 0.148   |
| <i>PSMB9</i> | <b>0.049</b> | 0.148   |
| <i>PSMB8</i> | 0.082        | 0.185   |

**Supplemental Table 2:** Differential expression analysis results for HLA-I APM genes in the anti-PD-1-treated cohort. Mann-Whitney U test p-values and FDR-corrected q-values are shown for the comparison of individual HLA-I APM gene expression in clinical responders vs. non-responders.

| Gene         | P-value      | Q-value |
|--------------|--------------|---------|
| <i>HLA-A</i> | <b>0.038</b> | 0.172   |
| <i>HLA-B</i> | 0.195        | 0.339   |
| <i>HLA-C</i> | 0.111        | 0.333   |
| <i>TAP1</i>  | 0.458        | 0.515   |
| <i>TAP2</i>  | 0.186        | 0.339   |
| <i>TAPBP</i> | 0.226        | 0.339   |
| <i>B2M</i>   | <b>0.034</b> | 0.172   |
| <i>PSMB9</i> | 0.441        | 0.515   |
| <i>PSMB8</i> | 0.604        | 0.604   |
